# Supplementary material for: High-Altitude Hypoxia Exposure Induces Iron Overload and Ferroptosis in Adipose Tissue
Source: MDPI journal article supplement (doi:10.3390/antiox11122367), 2022-11-29
Supplement: s1 [file s1]

## Supplementary data

**Table S1. Primers used for quantitative real-time PCR**

| Gene         | Forward sequence (5'-3') | Reverse sequence (3'-5') |
|--------------|--------------------------|--------------------------|
| CCL2         | ACATTCGGCGGTTGCTCTAG     | ACATCCTGTATCCACACGGCAG   |
| CD11c        | CTGGATAGCCTTTCTTCTGCTG   | GCACACTGTGTCCGAAGTC      |
| CHAC1        | CTTGGTGGCTATGACACTAAGG   | CCTCGGCAAGCAAGGATCTG     |
| FTH          | GATCAACCTGGAGTTGTATGCC   | GATATTCTGCCATGCCAGCTTC   |
| FTL          | CAGTCTGCACCGTCTCTTCG     | GTCATGGCTGATCCGGAGTAG    |
| GPX4         | CATGCACGAATTCTCAGCCA     | CATATCGGGCATGCAGATCG     |
| HMOX1        | TGACACCTGAGGTCAAGCAC     | TCTCTGCAGGGGCAGTATCT     |
| IL1 $\beta$  | AGCCCATCCTCTGTCACTCA     | TGTCGTTGCTTGGTTCTCCT     |
| IL6          | CTCTGCAAGAGACTTCCATCCA   | CGTGGTTGTCACCAGCATCA     |
| iNOS         | GGAGTGACGGCAAACATGACT    | TCGATGCACAACCTGGGTGAAC   |
| SLC7A11      | ATCGGGACTGCTAATGAGAATT   | CTATTTTACCACCATCAGTGCG   |
| TFR          | TGATTGTTAGAGCAGGGGAAA    | ATGACTGAGATGGCGGAAAC     |
| TNF $\alpha$ | TCCCAGGTTCTCTTCAAGGGA    | GGTGAGGAGCACGTAGTCGG     |
| 18S rRNA     | GCCCTCCAATGGATCCTCGTTA   | GAAACGGCTACCACATCCAAGG   |

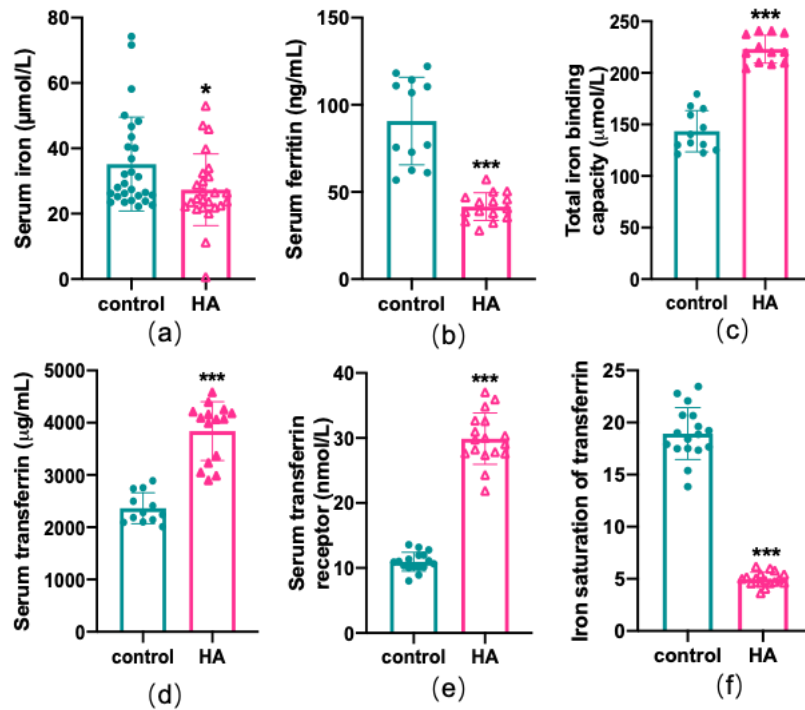

**Figure S1.** Serum iron parameters are altered during high-altitude hypoxia exposure.

Data are presented as the mean  $\pm$  SEM. \*  $p < 0.05$ , \*\*  $p < 0.01$ , and \*\*\*  $p < 0.001$ , versus control.

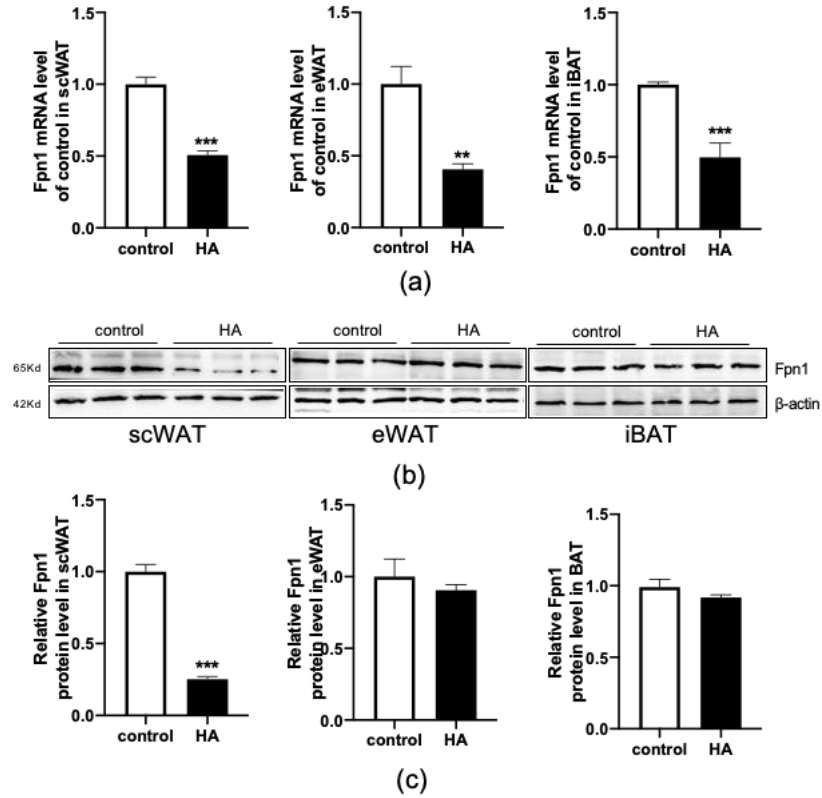

**Figure S2.** Changes in the mRNA and protein expressions of Fpn1. A RT-qPCR of Fpn1 genes after HA exposure. B Fpn1 protein bands after ECL imaging. C Quantification of the bands, normalized to  $\beta$ -actin. The values are representative of three independent experiments. Data are presented as the mean  $\pm$  SEM. \*\*  $p < 0.01$ , \*\*\*  $p < 0.001$ , versus control.
